# Supplementary material for: Identification and Verification of Biomarkers and Immune Infiltration in Obesity-Related Atrial Fibrillation
Source: MDPI journal article supplement (doi:10.3390/biology12010121), 2023-01-12
Supplement: s1 [file s1]

**Table S1.** Patients' baseline characteristics

|                           | <b>Lean-SR</b> | <b>Obese-SR</b> | <b>Lean-AF</b> | <b>Obese-AF</b> |
|---------------------------|----------------|-----------------|----------------|-----------------|
| Number                    | 7              | 8               | 8              | 8               |
| Male n (%)                | 5 (71.4)       | 6 (75)          | 4 (50)         | 6 (75)          |
| Age (in years)            | 38.8±19.2      | 58.7±7.1        | 73.4±13.3      | 59.5±9.6        |
| History of AF (in months) | 0              | 0               | 67.4±91.7      | 50.9±57.8       |
| BMI (kg/m <sup>2</sup> )  | 21.6±2.1       | 31.2±0.6        | 20.3±2.4       | 31.1±0.9        |
| Diabetes n (%)            | 0 (0)          | 4 (50)          | 0 (0)          | 5 (62.5)        |
| Hyperlipidemia n (%)      | 0 (0)          | 7 (87.5)        | 0 (0)          | 6 (75)          |
| Hypertension n (%)        | 2 (28.5)       | 6 (75)          | 3(37.5)        | 7 (87.5)        |

Values are mean ± SEM or numbers (percentage).

**Table S2.** Primers used in this study for RT-qPCR experiments

| <b>Gene</b>  | <b>Forward (5' to 3')</b> | <b>Reverse (5' to 3')</b> |
|--------------|---------------------------|---------------------------|
| Homo MNDA    | TGTCCCAAGAGCAGAGTAAGC     | ACCACTGTCACTGGGTCGTT      |
| Homo CYBB    | AGGAGTTTCAAGATGCGTGGA     | AGCTTCAGATTGGTGGCGTTA     |
| Homo CD86    | TGACCTGCTCATCTATACACGG    | GCTGATGGAAACGTCGTACA      |
| Homo FCGR2C  | AAATGGAGACTGGAAAAATTCCTGA | CCCGTGAAGTTTTGCTTGTGT     |
| Homo NCF2    | CTCTCCGCAGTCCGACATC       | AGCTTCACTTCCTTAGGCTCTTC   |
| Homo LCP2    | CCACCCTCCAATGACGAGG       | GGGCGGCCATCGGTCT          |
| Homo TLR8    | CCAAACTGCCAAGCTCCCTAC     | CCTCGGACAGTTCCCGCTTA      |
| Homo HLA-DRA | GGCGGCTTGAAGAATTTGGAC     | CACAGGGCTGTTTGTGAGCA      |
| Homo LCP1    | GAGAAGAGCGGACATTTAGGAA    | GGGGTATGGCGGTTTGTTTA      |
| Homo PTPN22  | TCCTACAACTGTGGCTGAGAAG    | TAGCTGGAATCCTCATCAGAGGT   |
| Homo ACTB    | GTTGCGTTACACCCTTTCTTG     | GGGGATGCTCGCTCCAA         |

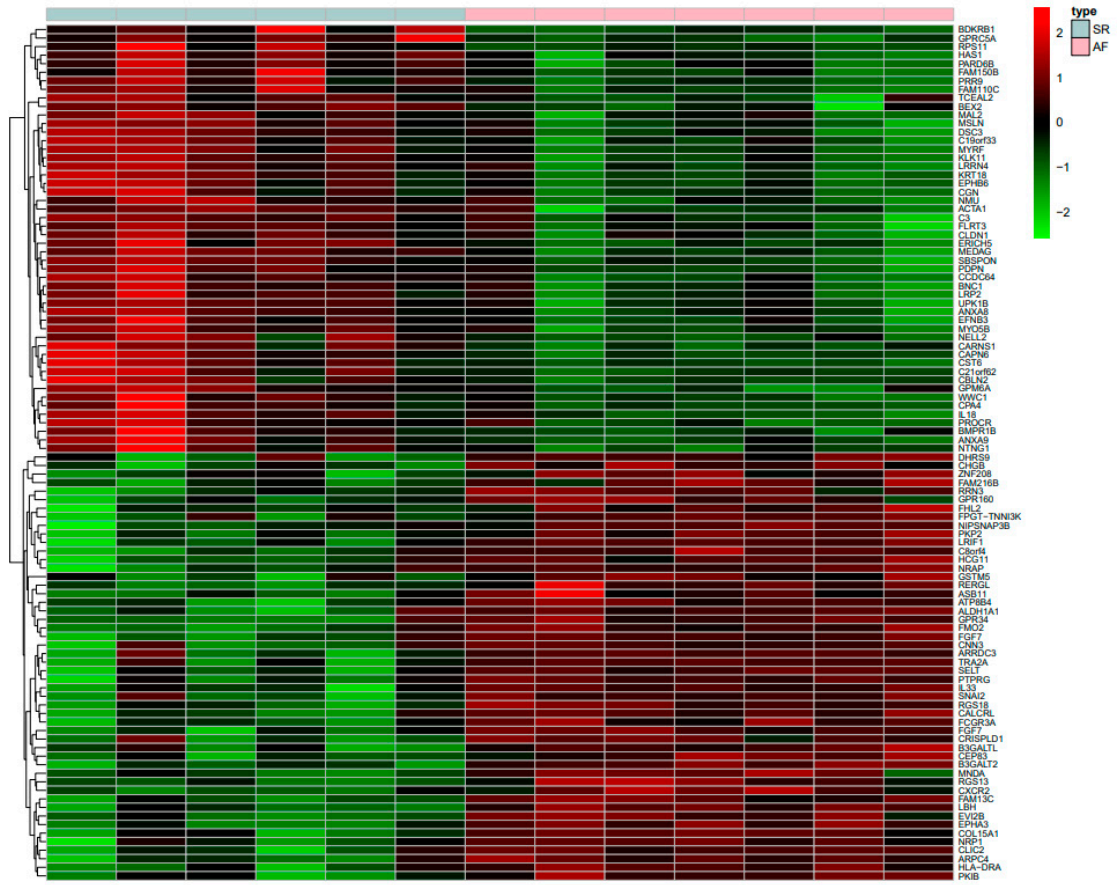

**Figure S1.** Hierarchical clustering analysis of AF-related top 50 up-regulated and top 50 down-regulated expressed genes.

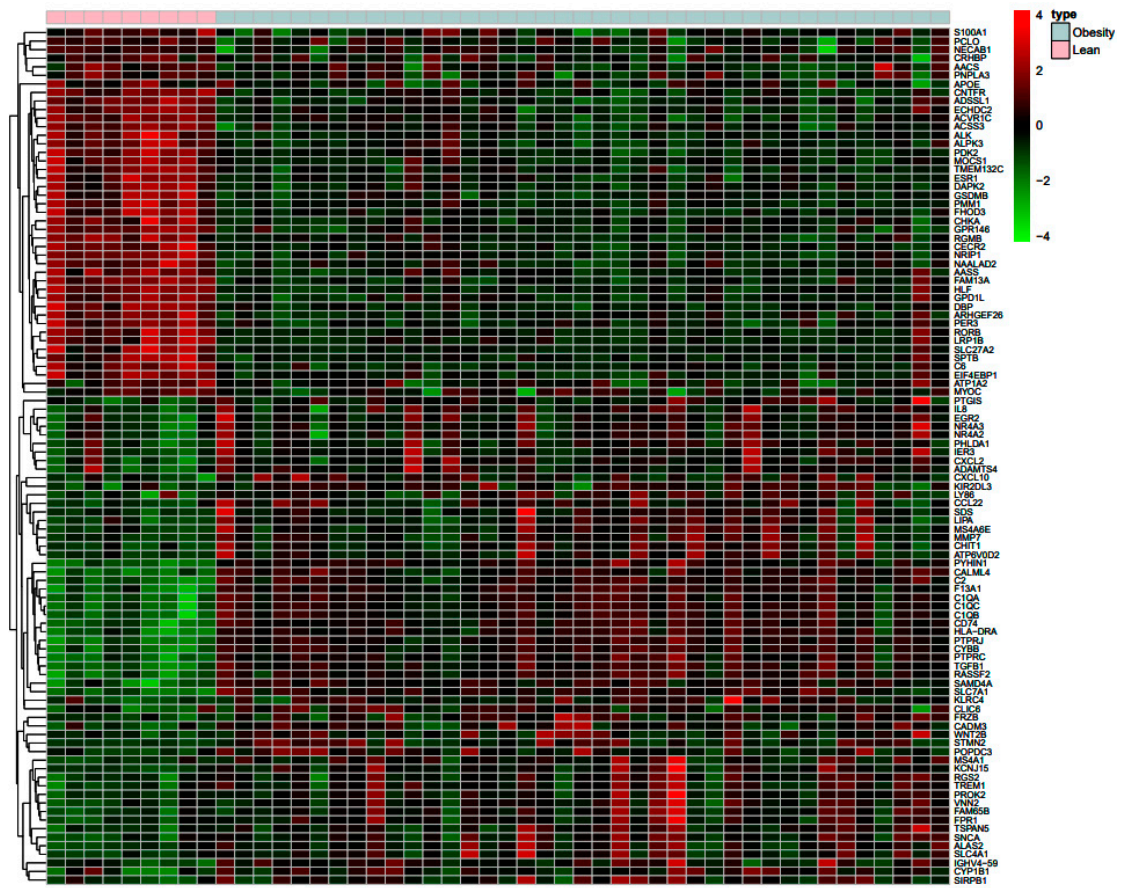

**Figure S2.** Hierarchical clustering analysis of obese-related top 50 up-regulated and top 50 down-regulated expressed genes.
